# Supplementary material for: AP endonuclease independent repair of abasic sites in Schizosaccharomyces pombe
Source: PubMed Central journal article supplement — Nucleic Acids Res. 2011 Nov 14;40(5):2000–9. doi: 10.1093/nar/gkr933 (PMC3300018; doi:10.1093/nar/gkr933), 2011-11-14
Supplement: supp_gkr933_nar-02054-d-2011-File007.pdf [file supp_gkr933_nar-02054-d-2011-File007.pdf]

## Supplementary figure 1

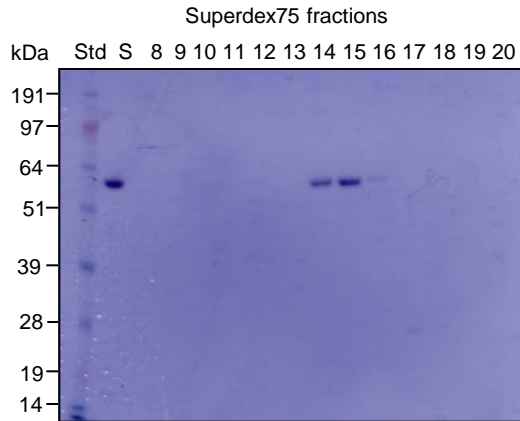

**Figure S1.** Purification of recombinant *S. pombe* Tdp1. 2  $\mu$ L of the sample (S) applied onto the Superdex75 SMART column and 5  $\mu$ l of the fractions from Superdex75 were separated on a 10% SDS-PAG. The gel was stained with Coomassie Blue.

## Supplementary figure 2

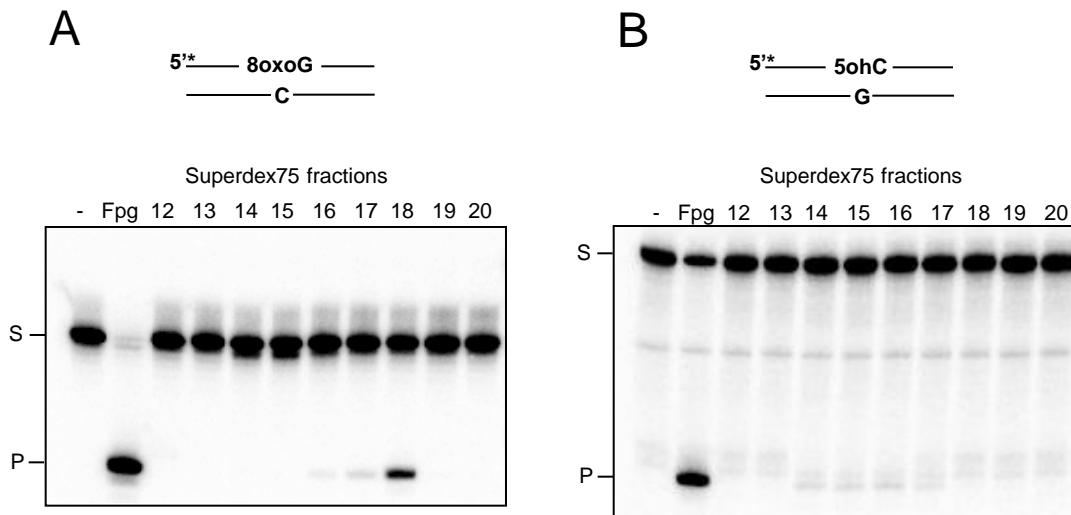

**Figure S2.** DNA glycosylase assays. **(A)** 8oxoG DNA glycosylase assay revealed no *E. coli* Fpg activity in fr. 14 from Superdex75. 1  $\mu$ L of fraction 12-20 from the Superdex75 SMART column were incubated with double stranded DNA containing an 8oxoG (opposite C) and analyzed for cleavage as described in Figure 1A. The substrate (S) and the cleavage product (P) are indicated. **(B)** 5ohC DNA glycosylase assay revealed no *E. coli* Nei activity in fr. 14 from Superdex75. 1  $\mu$ L of fraction 12-20 from the Superdex75 SMART column were incubated with double stranded DNA containing a 5ohC (opposite G) and analyzed for cleavage as described in Figure 1A. The substrate (S) and the cleavage product (P) are indicated.
